# Supplementary material for: A Nomogram for Predicting Prognosis of Advanced Schistosomiasis japonica in Dongzhi County—A Case Study
Source: MDPI journal article supplement (doi:10.3390/tropicalmed8010033), 2023-01-03
Supplement: s1 [file s1]

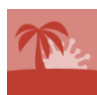

# Supplementary Materials for A nomogram for predicting prognosis of advanced schistosomiasis japonica in Dongzhi County-a case study

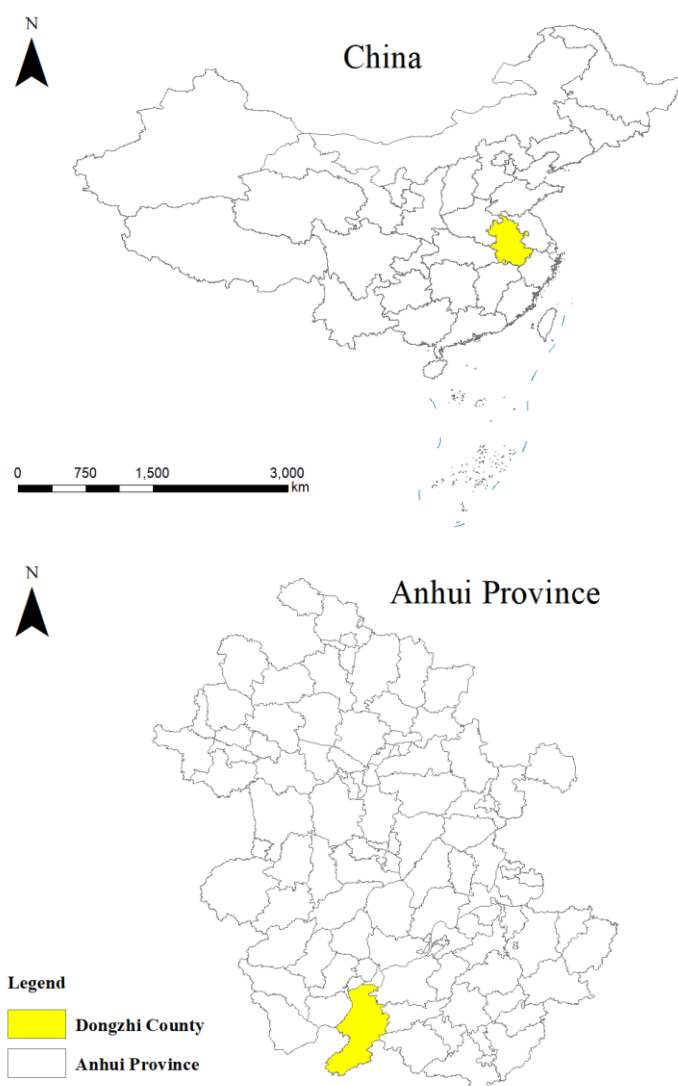

Figure S1. Dongzhi County.

Table S1. Results of the confusion matrix.

|            |          | Training set |     | Validation set |     |
|------------|----------|--------------|-----|----------------|-----|
|            |          | Actual       |     | Actual         |     |
| Predictive | Positive | 45           | 13  | 19             | 5   |
|            | Negative | 13           | 369 | 3              | 161 |
